# Supplementary material for: Chemical synthesis of peptidoglycan mimetic–disaccharide-tetrapeptide conjugate and its hydrolysis by bacteriophage T5, RB43 and RB49 L-alanyl-D-glutamate peptidases
Source: PeerJ. 2021 May 19;9:e11480. doi: 10.7717/peerj.11480 (PMC8140593; doi:10.7717/peerj.11480)
Supplement: Supplemental Information 2 — In these experiments, the GMTP hydrolysis was catalyzed by A. EndoRB49 (pH = 7.3); B. EndoT5 (pH = 7.3); C. EndoRB49 (pH 4.3); and D. EndoRB43 (pH = 7.3). [file peerj-09-11480-s002.xlsx]

## Sheet: Sheet1
Fig. 4A	Time (min)	[Substrate]	Error_S	Error_P		fig.4В	Time (hr)	[Substrate]	[Product]	Error_S	Error_P	fig.4С	Time (hr)	[Substrate]	[Product]	Error_S	Error_P	fig.4D	Time (hr)	[Substrate]	[Product]	Error_S	Error_P
EndoRB49 (pH = 7.3)	0	0.8	0.2	0.015	0.015	EndoT5 (pH = 7.3)	0	1	0	0.018	0.03	EndoRB49 (pH 4.3)	0	1	0	0.025	0.027	EndoRB43 (pH = 7.3)	0	1	0	0.025	0.027
	4.7	0.73	0.27	0.015	0.015		18.2	0.65	0.34	0.018	0.025		1.23	0.93	0.07	0.025	0.027		0.67	0.96	0.04	0.025	0.027
	9.4	0.67	0.33	0.015	0.015		23.2	0.58	0.42	0.018	0.023		4.3	0.76	0.24	0.025	0.027		2.6	0.85	0.15	0.025	0.027
	14.1	0.61	0.39	0.015	0.015		26.6	0.54	0.46	0.018	0.022		7.37	0.62	0.38	0.025	0.027		3.87	0.78	0.22	0.025	0.027
	18.8	0.57	0.43	0.015	0.015		30.1	0.5	0.5	0.018	0.02		10.43	0.51	0.49	0.025	0.027		5.92	0.67	0.33	0.025	0.027
	23.5	0.52	0.48	0.015	0.015		33.5	0.45	0.55	0.018	0.02		13.5	0.41	0.59	0.025	0.027		9.02	0.51	0.49	0.025	0.027
	28.2	0.46	0.54	0.015	0.015		37	0.42	0.58	0.018	0.02		15.57	0.34	0.66	0.025	0.027		12.12	0.39	0.61	0.025	0.027
	32.9	0.42	0.58	0.015	0.015		41.7	0.38	0.62	0.018	0.02		19.63	0.27	0.73	0.025	0.027		15.22	0.3	0.7	0.025	0.027
	37.6	0.4	0.6	0.015	0.015		46.2	0.32	0.68	0.018	0.02		22.7	0.22	0.78	0.025	0.027		21.42	0.19	0.81	0.025	0.027
	42.3	0.37	0.63	0.015	0.015		49.8	0.3	0.7	0.018	0.02		28.87	0.16	0.84	0.025	0.027		24.52	0.15	0.85	0.025	0.027
	47	0.33	0.67	0.015	0.015		54.3	0.28	0.72	0.018	0.02		46.87	0.06	0.94	0.025	0.027		26.68	0.12	0.88	0.025	0.027
	51.7	0.315	0.69	0.015	0.015		58.8	0.25	0.74	0.022	0.02								28.35	0.12	0.88	0.025	0.027
	56.4	0.28	0.72	0.015	0.015		63.3	0.23	0.77	0.023	0.02
	61.1	0.24	0.76	0.015	0.015		67.83	0.19	0.81	0.025	0.02
	65.8	0.23	0.77	0.015	0.015		77.25	0.14	0.87	0.03	0.02
	70.5	0.2	0.8	0.015	0.015
	75.2	0.19	0.81	0.015	0.015
	79.9	0.17	0.83	0.015	0.015
	84.6	0.15	0.85	0.015	0.015
	89.3	0.145	0.855	0.015	0.015
	94	0.14	0.86	0.015	0.015
	98.7	0.12	0.88	0.015	0.015
	103.4	0.112	0.888	0.015	0.015
	108.1	0.1	0.9	0.015	0.015
	112.8	0.1	0.9	0.015	0.015
These are raw data for Figure 4 showing results of transformation of GMTP with the addition of
enzymes. The ascending curve shows an increase in the concentration of the final product, and the
descending curve shows the change in the concentration of the original substrate. The circles are the
measured values, the lines are the exponential approximations (fitting) (R2 = 0.9995). In these
experiments, the GMTP hydrolysis was catalyzed by A. EndoRB49 (pH = 7.3); B. EndoT5 (pH = 7.3); C.
EndoRB49 (pH 4.3); and D. EndoRB43 (pH = 7.3).
